# Supplementary material for: Photocatalytic decarboxylative deuteration of lauric acid with heavy water for sustainable synthesis of deuterated alkanes
Source: Royal Society of Chemistry journal article supplement (doi:10.1039/d5cy00316d), 2025-01-01
Supplement: d5cy00316d1.pdf [file d5cy00316d1.pdf]

## Supplementary Information

### Photocatalytic decarboxylative deuteration of lauric acid with heavy water for sustainable synthesis of deuterated alkanes

Haifan Huang,<sup>a</sup> Zihan Lin,<sup>a</sup> Akira Yamamoto,<sup>a</sup> Bhoi Yagna Prakash,<sup>a</sup> Kexin Zou,<sup>a</sup> Shohichi Furukawa,<sup>a</sup> Ken-ichi Fujita,<sup>a</sup> Gunik Lee,<sup>b</sup> Jun Kumagai<sup>c</sup> and Hisao Yoshida<sup>\*a</sup>

<sup>a</sup> Graduate School of Human and Environmental Studies, Kyoto University, Yoshida-nihonmatsu-cho, Sakyo-ku, Kyoto 606-8501, Japan

<sup>b</sup> Department of Material Chemistry, Graduate School of Engineering, Nagoya University, Chikusa, Nagoya 464-8603, Japan

<sup>c</sup> Institute of Materials and Systems for Sustainability Division of Materials Research, Nagoya University, Furo-cho, Chikusa-ku, Nagoya, Aichi 464-8601, Japan

\* Corresponding author: yoshida.hisao.2a@kyoto-u.ac.jp

### Contents

|                                                                      |    |
|----------------------------------------------------------------------|----|
| 1. Methods .....                                                     | 2  |
| 1.1 Synthesis deuterated <i>n</i> -undecane by Grignard reagent..... | 2  |
| 1.2 Analysis of deuterated compounds and isomers.....                | 4  |
| 2. Supplementary Results in Tables .....                             | 9  |
| References.....                                                      | 11 |

## 1. Methods

### 1.1 Synthesis deuterated *n*-undecane by Grignard reagent

Deuterated *n*-undecane (*n*-undecane-*d*) was synthesized as a reference compound using Grignard reagent (Scheme S1).<sup>S1</sup> A 50 ml solution of 1-chloroundecane (CH<sub>3</sub>(CH<sub>2</sub>)<sub>10</sub>Cl) in diethyl ether (2.5 mol/L) was introduced into an argon-purged Schlenk tube. Separately, 18.75 mmol of magnesium (Mg) powder and 5–7 iodine (I<sub>2</sub>) beads were placed in an eggplant flask and purged with argon. The flask was gently heated with the dryer to activate the iodine through evaporation. To initiate the reaction, 5 mL of the prepared 1-chloroundecane ether solution was carefully added dropwise via syringe while monitoring the reaction temperature to prevent runaway conditions. The remaining 45 mL of the solution was then added smoothly. The reaction mixture was stirred at room temperature for 1.5 h to generate the Grignard reagent (CH<sub>3</sub>(CH<sub>2</sub>)<sub>10</sub>ClMg). Subsequently, 2 ml heavy water (D<sub>2</sub>O) was injected to quench the Grignard reagent, yielding *n*-undecane-*d*<sub>1</sub>. To ensure safety and manage the exothermic nature of the reaction, the flask was cooled with an ice water bath. After the completion of cooling, the mixture was filtered, dehydrated with sodium sulfate (Na<sub>2</sub>SO<sub>4</sub>), and filtered again. The ether solvent was then evaporated to isolate the synthesized *n*-undecane-*d*<sub>1</sub> as the final product.

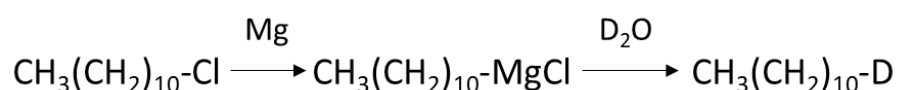

Scheme S1 Synthesis of deuterated *n*-undecane by using Grignard reagent. <sup>S1</sup>

The product was confirmed by <sup>13</sup>C and <sup>1</sup>H NMR and MS(EI). The data of the product is as follows:

Deuterated undecane (*n*-undecane-1-*d*, C<sub>11</sub>H<sub>23</sub>D) synthesized using Grignard reagent: <sup>1</sup>H NMR (500 MHz, CDCl<sub>3</sub>) δ 1.26 (m, 18H), 0.88 (t, *J* = 7.0 Hz, 5H). <sup>13</sup>C NMR (100 MHz, CDCl<sub>3</sub>) δ 31.93, 31.90, 29.72, 29.67 (2C), 29.38 (2C), 22.70, 22.62, 14.14, 13.85 (t, *J* = 28.6, C-D). MS (EI): *m/z*: 157. <sup>S2</sup>

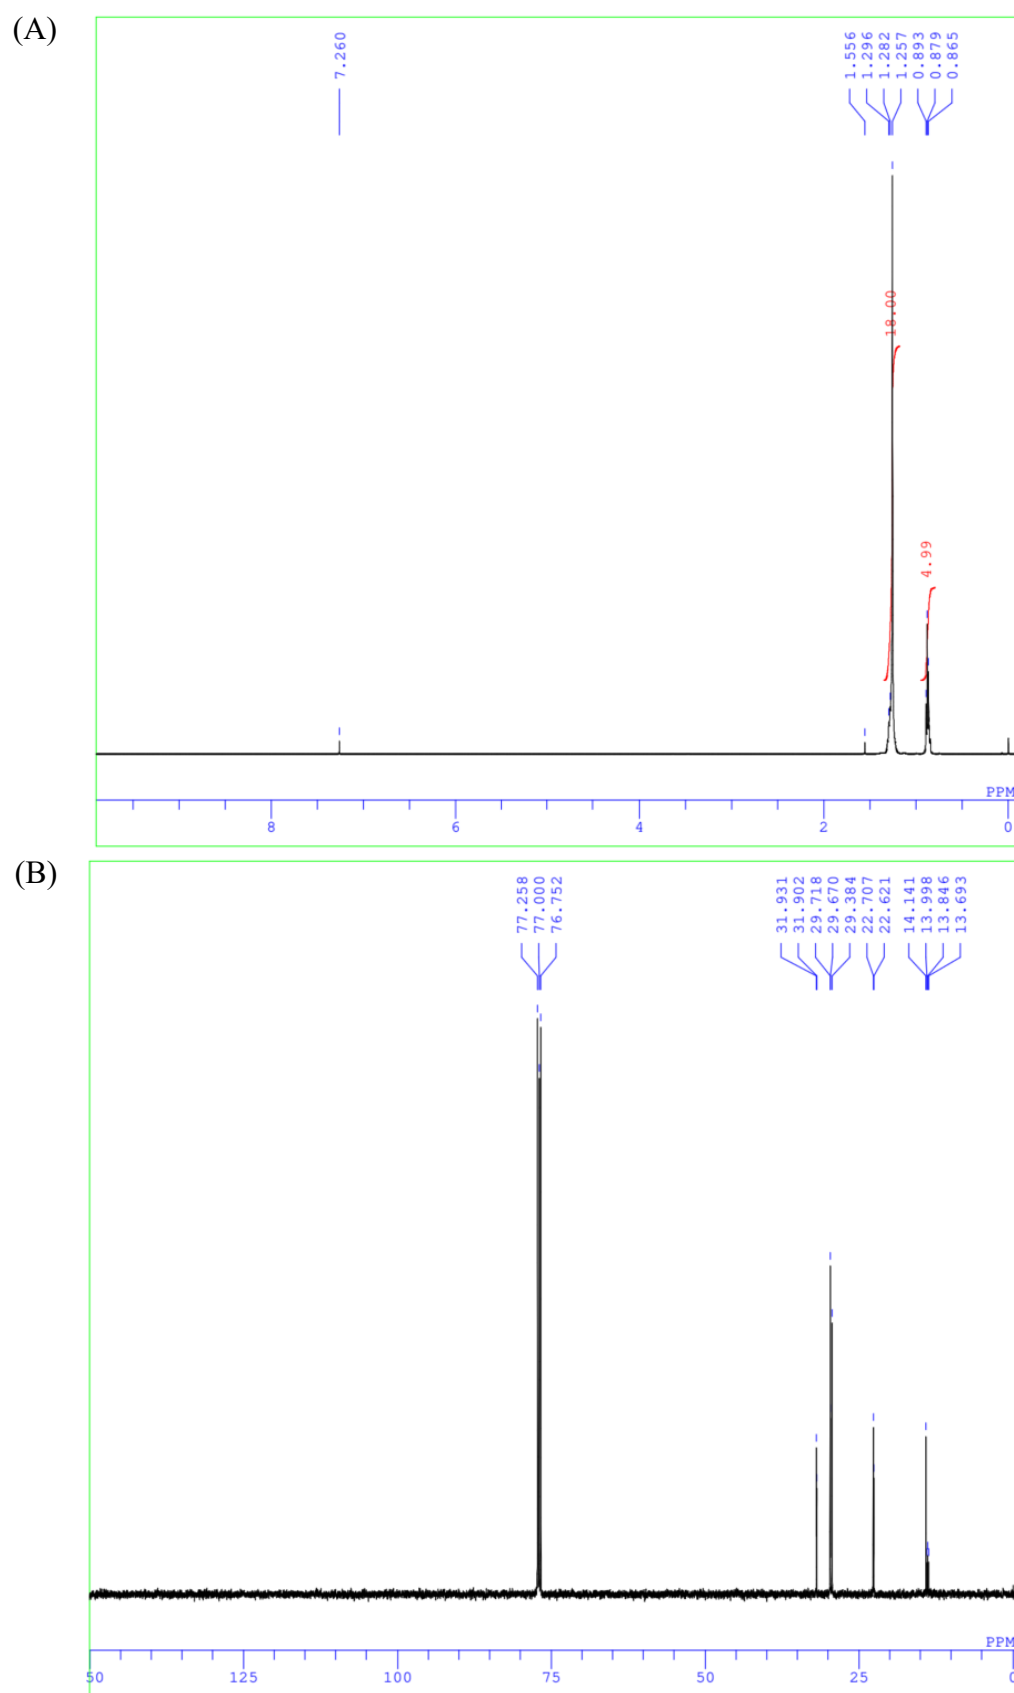

Fig. S1 NMR spectra of the deuterated undecane ( $C_{11}H_{23}D$ ) synthesized using Grignard reagent: (A)  $^1H$  NMR (500 MHz,  $CDCl_3$ ) and (B)  $^{13}C$  NMR (100 MHz,  $CDCl_3$ ).

## 1.2 Analysis of deuterated compounds and isomers

GC-FID and GC-MS were used to determine the amount of deuterated undecane. Fig. S2a and Fig. S2b show the chromatograms of GC-FID and GC-MS, respectively, recorded for the products in a photocatalytic reaction test (3 h, 50mg of Au(0.1)/TiO<sub>2</sub>,  $\lambda > 360$  nm). The peaks for the reactants and products appeared in the same order in both chromatograms.

In the total ion chromatogram of GC-MS (Fig. S2b, black line), a peak was observed at a retention time of 8.0 min, which was assigned to *n*-undecane (C<sub>11</sub>H<sub>24</sub>,  $m/z=156$ ). Corresponding peak was also detected in each chromatogram of  $m/z=155$ , 156, and 157. These peaks were close to the mass number of *n*-undecane, although they displayed slightly different retention times (ranging from 8.2 to 8.25 min). This observation suggests that at least two compounds contributed to these peaks, as shown in Fig. S2c.

The commercially obtained *n*-undecane-*d*<sub>0</sub> (mass number=156) produced peaks at the retention time corresponding to  $m/z=156$  (major) and 157. No peak was observed in the chromatogram for  $m/z=155$  (Fig. S2d) while the *n*-undecane-*d*<sub>1</sub> (mass number=157) synthesized using the Grignard reagent (Scheme S1) exhibited one peak in each chromatogram for  $m/z=157$  (major),  $m/z=158$  (minor), and  $m/z=156$  (very minor) as shown in Fig. S2e. The small peak at  $m/z=156$  appeared at a slightly different retention time, assignable to *n*-undecane-*d*<sub>0</sub> as a byproduct formed during synthesis. It is noted that while both *n*-undecane-*d*<sub>0</sub> and *n*-undecane-*d*<sub>1</sub> displayed the main peaks in their respective chromatograms for  $m/z=156$  and  $m/z=157$ , they also exhibited minor peaks at  $m/z=157$  and  $m/z=158$ , respectively. Consequently, the peak at  $m/z=157$  is unsuitable for quantitative analysis. Furthermore, the peak at  $m/z=158$  consisted of multiple overlapping peaks and did not consistently yield a linear calibration curve. This suggests the presence of multiple compounds, such as *n*-undecane-*d*<sub>2</sub>. Given these limitations, the peak area of  $m/z=156$  was used to quantify the concentration of *n*-undecane-*d*<sub>0</sub> ( $A_{C11-h}$ ). The concentration of *n*-undecane-*d* ( $A_{C11-d}$ ) was determined by subtracting  $A_{C11-h}$  from the total concentration of *n*-undecane ( $A_{sum}$ , the sum of  $A_{C11-h}$  and  $A_{C11-d}$ ), as measured by GC-FID (Fig. S2a, C<sub>11</sub>). This calculation is expressed in Eq. S1.

$$A_{C11-d} = A_{sum} \text{ (from GC-FID)} - A_{C11-h} \text{ (from GC-MS)} \quad (S1)$$

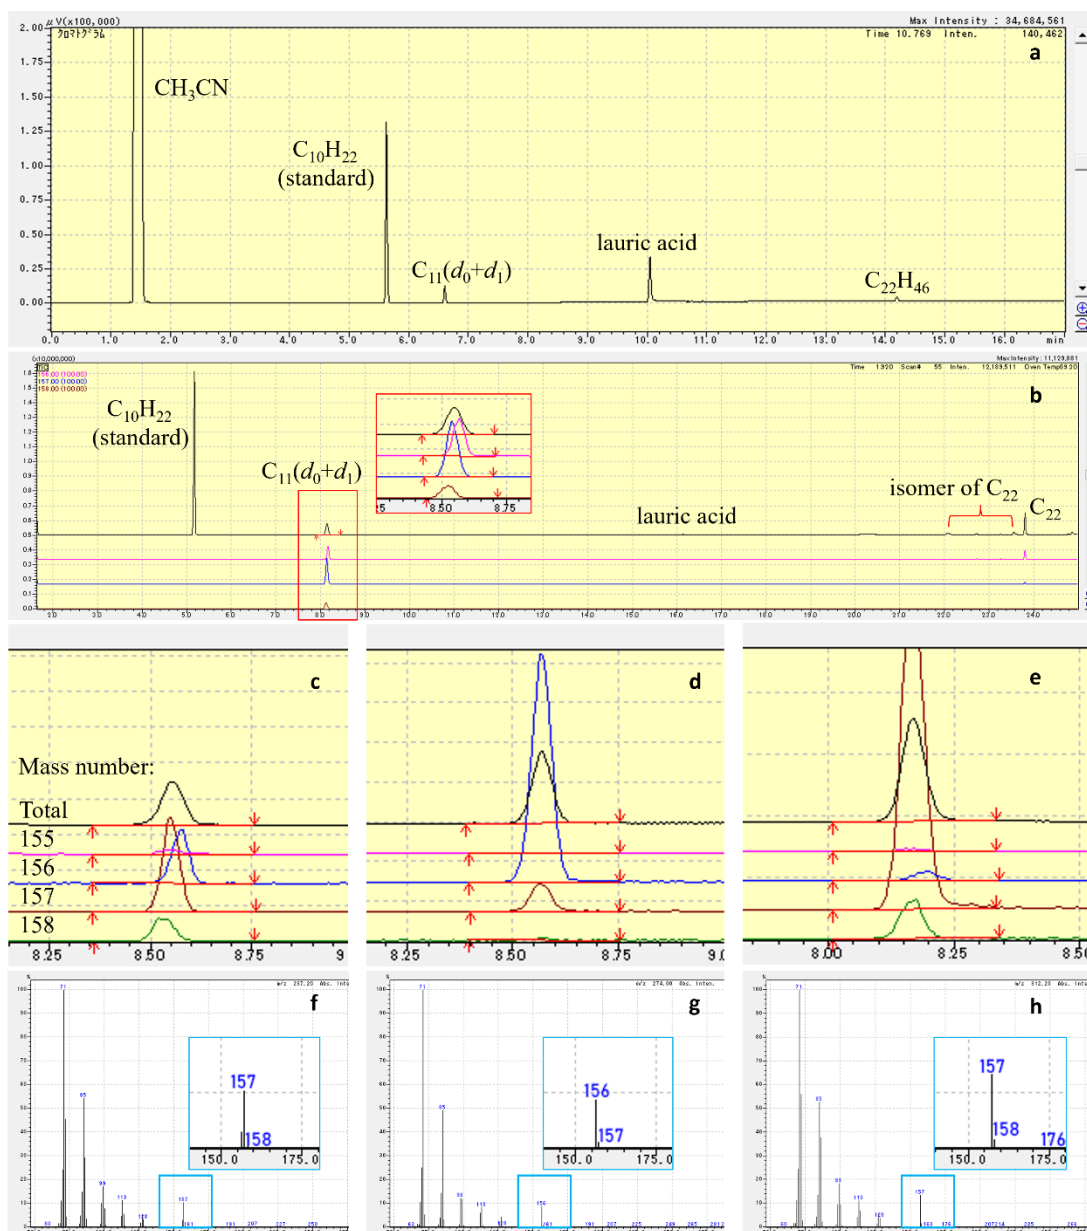

Fig. S2 Chromatogram of GC-FID (a), and total ion chromatogram of GC-MS of the obtained product solution (b), and the ion chromatograms for some  $m/z$  (total, and 155-158) at the peak for *n*-undecane in the product solution (c), commercially obtained *n*-undecane-*h* (d), and synthesized *n*-undecane-*d* (e), where the intensity of the chromatograms for each  $m/e$  was enlarged 100 times. MS spectra of the peak for *n*-undecane in the product solution (f), the commercially obtained *n*-undecane-*h* (g), and synthesized *n*-undecane-*d* (h) were also shown.

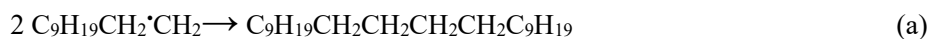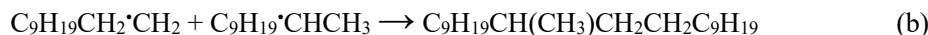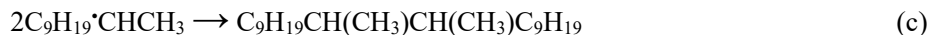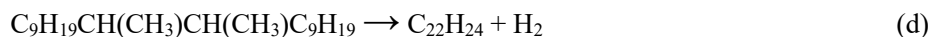

Scheme S2 Formation of C<sub>22</sub> isomers, (a) coupling of two primary undecyl radicals, (b) coupling of primary and secondary undecyl radicals, (c) coupling of two secondary undecyl radicals, and (d) dehydrogenation of docosane to docosene.

In the total ion chromatogram of GC-MS (Fig. S2b), four peaks observed were assignable for isomers of C<sub>22</sub> as byproducts, which would be produced from the coupling of two radical intermediates, i.e., primary and secondary undecyl radicals,  $\cdot\text{C}_{11}\text{H}_{23}$ . This fact supports that the rearrangement of carbon radicals took place as well. Since the primary carbon radical is not as stable as the secondary one, radical rearrangement (intramolecular hydrogen atom transfer) can take place to form secondary radicals (See the main text). The coupling of two primary radicals gives *n*-docosane without branch (C<sub>22</sub>H<sub>46</sub>, Scheme S2a), coupling of the primary and secondary radicals gives an isomer, 10-methylhenicosane (C<sub>9</sub>H<sub>19</sub>CH(CH<sub>3</sub>)C<sub>11</sub>H<sub>23</sub>, Scheme S2b), and coupling of two secondary radicals leads to another isomer, 10,11-dimethylcosane (C<sub>9</sub>H<sub>19</sub>CH(CH<sub>3</sub>)CH(CH<sub>3</sub>)C<sub>9</sub>H<sub>19</sub>, Scheme S2c).

According to the retention time, the highest peak among the four peaks in the range for C<sub>20</sub>–C<sub>22</sub> hydrocarbons was assignable to *n*-docosane (C<sub>22</sub>H<sub>46</sub>, Scheme S2c). Other three peaks were detected with earlier retention times than the peak of *n*-docosane in GC-MS (Fig. S1b). Very small peaks with shorter retention times were assigned to the branched isomers with shorter main carbon chains (Scheme S2b and c), suggesting these were formed from the secondary radical(s). MS indicated the presence of an alkene (C<sub>22</sub>H<sub>44</sub>), suggesting a possible dehydrogenation route for alkene formation from C<sub>22</sub> as shown in scheme S2d. In conclusion, isomers of docosane and further dehydrogenated product were confirmed, which should be formed by coupling of the undecyl radicals.

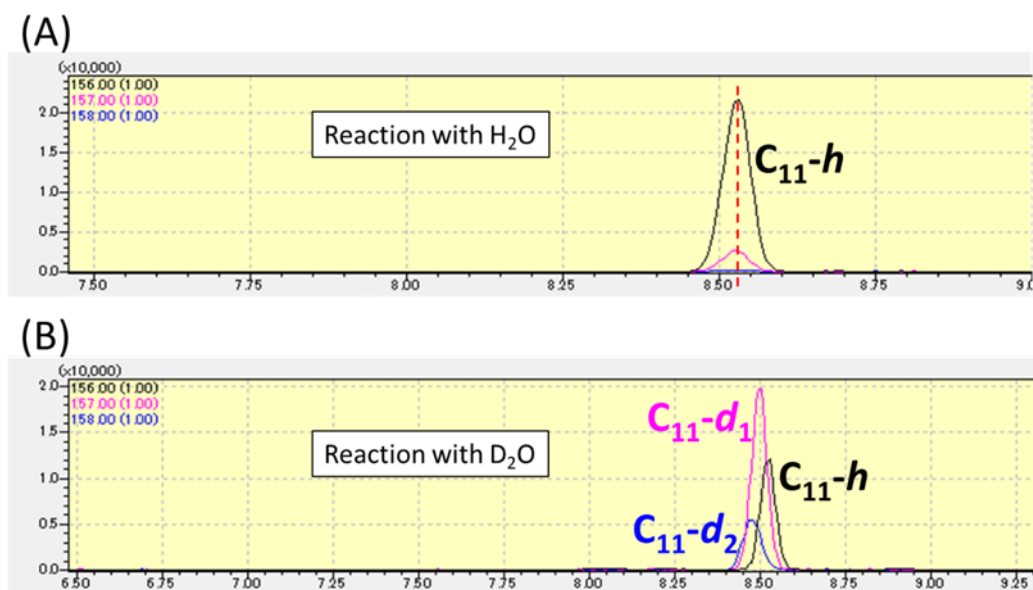

Fig. S3 The GC-MS total ion chromatograms of the obtained product solution from the photocatalytic reaction test of LA decarboxylation using (A) H<sub>2</sub>O and (B) D<sub>2</sub>O.

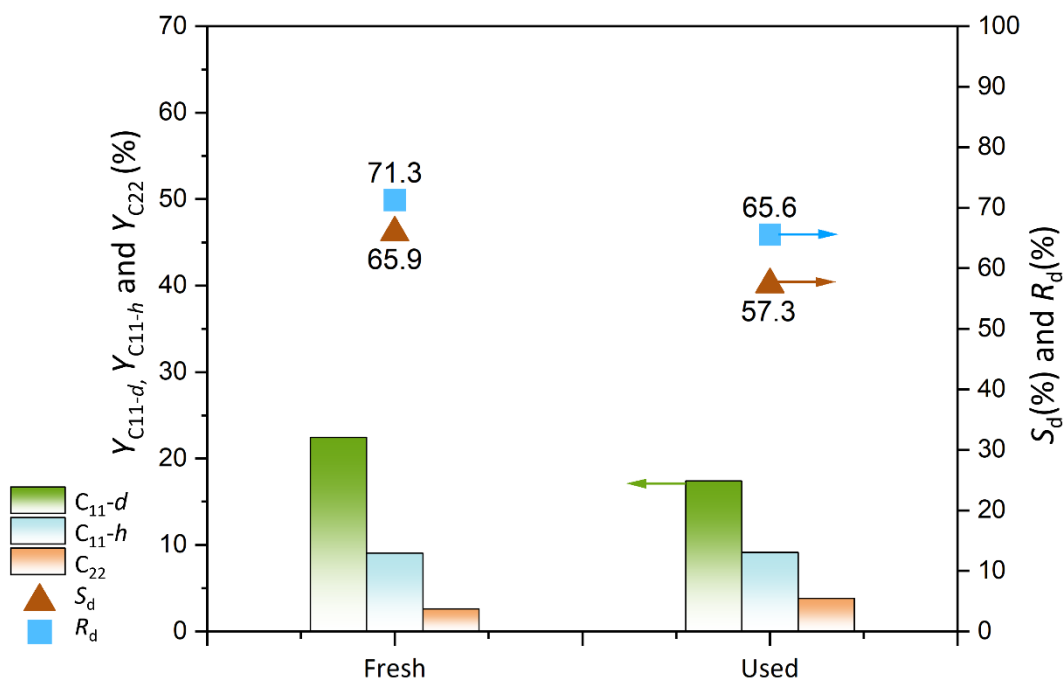

Fig. S4 Reuse test of photocatalytic lauric acid conversion over the Au(0.5)/TiO<sub>2</sub> sample. Find the experiment conditions for the first run in Table S7, entry d. After the first run, the photocatalyst was washed with CH<sub>3</sub>CN, followed by the second run without any pretreatment.

A reuse test was conducted. The same catalyst was used in two successive reaction runs. After the first reaction, the catalyst was washed three times with acetonitrile. For the second run, pre-heating and pre-irradiation were not conducted. As a result, the deuterated alkane was successively obtained (Fig. S4). However, the yield of the target product, C<sub>11-d</sub>, was found to have slightly decreased in the second run with the reused catalyst.  $R_d$  value was reduced from 71.3% to 65.6%. Notably, the used catalyst showed a lighter color than its initial purple tone. During the reaction process, the co-catalyst structure may have undergone changes or that the light-absorbing components may have been lost. Possible causes include aggregation of Au metal nanoparticles, localized leaching of active components, or contamination and blocking of active sites by organic byproducts on the surface. To improve the durability of the catalysts, further effort should be paid on the following aspects: the process of the catalyst recycling, catalyst surface modification, and the improving property of the loaded co-catalyst metals.



## 2. Supplementary Results in Tables

Table S1 Photocatalytic decarboxylation deuteration of lauric acid over various catalyst samples <sup>a</sup>.

| Entry | Catalyst <sup>b</sup>    | Product <sup>c</sup> (μmol) |            |          | $Y_{C_{11-d}}$ (%) <sup>d</sup> | $Y_{total}$ (%) <sup>e</sup> | $S_d$ (%) <sup>f</sup> | $R_d$ (%) <sup>g</sup> |
|-------|--------------------------|-----------------------------|------------|----------|---------------------------------|------------------------------|------------------------|------------------------|
|       |                          | $C_{11-d}$                  | $C_{11-h}$ | $C_{22}$ |                                 |                              |                        |                        |
| 1     | TiO <sub>2</sub>         | 1.10                        | 0.587      | 0.271    | 2.20                            | 4.46                         | 49.3                   | 65.2                   |
| 2     | Au(0.1)/TiO <sub>2</sub> | 1.75                        | 0.598      | 0.451    | 3.50                            | 6.50                         | 53.8                   | 74.5                   |
| 3     | Pt(0.1)/TiO <sub>2</sub> | 2.42                        | 1.05       | 1.48     | 4.84                            | 12.86                        | 37.6                   | 69.7                   |
| 4     | Pd(0.1)/TiO <sub>2</sub> | 3.34                        | 1.54       | 0.691    | 6.68                            | 12.52                        | 53.3                   | 68.4                   |

<sup>a</sup> Reaction conditions; catalyst 50 mg, the reaction mixture (5 mL) containing LA 40 mg (50 μmol), in D<sub>2</sub>O (3 mL) and CH<sub>3</sub>CN (2 mL), reaction time 0.5 h, light wavelength > 360 nm, irradiated light intensity 41 mW·cm<sup>-2</sup> when measured at 360 ± 20 nm. <sup>b</sup> ST-01 anatase. <sup>c</sup>  $C_{11-d_1}$  = n-undecane- $d_1$ ,  $C_{11}H_{23}D$ ,  $C_{11-d_0}$  = n-undecane- $d_0$ ,  $C_{11}H_{24}$ ,  $C_{22}$  = n-docosane; <sup>d</sup> Yield of n-undecane- $d_1$ ,  $Y_{C_{11-d_1}}$  (%) =  $100 \times A_{undecane-d_1} / A_{initial\ lauric\ acid}$ ; <sup>e</sup>  $Y_{total}$  (%) =  $100 \times (A_{undecane-d_1} + A_{undecane-d_0} + 2 \times A_{docosane}) / A_{initial\ lauric\ acid}$ ; <sup>f</sup> Selectivity of  $C_{11-d_1}$  to the obtained main products ( $C_{11}$  and  $C_{22}$ )  $S_d$  (%) =  $100 \times A_{undecane-d_1} / (A_{undecane-d_0} + A_{undecane-d_1} + 2 \times A_{docosane})$ . <sup>g</sup> Ratio of undecane- $d_1$  to sum of undecane- $d_1$  and undecane- $d_0$ ,  $R_d$  (%) =  $100 \times A_{undecane-d_1} / (A_{undecane-d_0} + A_{undecane-d_1})$ .

Table S2 Results of the blank tests. <sup>a</sup>

| Entry          | Photoirradiation | Photocatalyst | Product yield (%) <sup>b</sup> |            |          |
|----------------|------------------|---------------|--------------------------------|------------|----------|
|                |                  |               | $C_{11-d}$                     | $C_{11-h}$ | $C_{22}$ |
| 1              | No               | No            | n.d. <sup>c</sup>              | n.d.       | n.d.     |
| 2 <sup>d</sup> | No               | Yes           | n.d.                           | n.d.       | n.d.     |
| 3 <sup>e</sup> | Yes              | No            | n.d.                           | n.d.       | n.d.     |

<sup>a</sup> The reaction conditions and time are the same as in Table S1. <sup>b</sup> See the caption for Table S1. <sup>c</sup> n.d. = not detected. <sup>d</sup> Amount of the Au(0.1)/TiO<sub>2</sub> sample was 50 mg. <sup>e</sup> Incident light wavelength was > 360 nm; irradiated light intensity was 41 mW cm<sup>-2</sup> when measured at 360 ± 20 nm.

Table S3 Results of the photocatalytic reaction test with various reaction times. <sup>a</sup>

| Entry | Time/hour | Product yield <sup>b</sup> (%) |            |          | $Y_{total}$ (%) | $S_d$ (%) | $R_d$ (%) |
|-------|-----------|--------------------------------|------------|----------|-----------------|-----------|-----------|
|       |           | $C_{11-d}$                     | $C_{11-h}$ | $C_{22}$ |                 |           |           |
| 1     | 0.5       | 3.50                           | 1.19       | 1.80     | 6.50            | 53.9      | 74.6      |
| 2     | 1         | 6.86                           | 1.06       | 2.93     | 10.9            | 63.2      | 86.6      |
| 3     | 3         | 9.28                           | 4.40       | 5.52     | 19.2            | 48.3      | 67.8      |
| 4     | 5         | 11.4                           | 5.52       | 8.60     | 25.5            | 44.6      | 67.3      |
| 5     | 6         | 11.5                           | 6.20       | 11.5     | 29.2            | 39.4      | 64.9      |

<sup>a</sup> Reaction conditions were the same as shown in Table S1, photocatalyst was 50 mg of the Au(0.1)/TiO<sub>2</sub> sample; <sup>b</sup> See the caption for Table S1;  $Y_{C_{11-d}}$  (%) =  $100 \times A_{undecane-d_1} / A_{initial\ lauric\ acid}$ ;  $Y_{C_{22}}$  (%) =  $100 \times 2 \times A_{docosane} / A_{initial\ lauric\ acid}$

Table S4 Photocatalytic deuteration of lauric acid over the Au(x)/TiO<sub>2</sub> samples <sup>a</sup>

| Entry | Catalyst                 | Product yield (%)       |                         |                       | <i>Y<sub>total</sub></i> (%) | <i>S<sub>d</sub></i> (%) | <i>R<sub>d</sub></i> (%) |
|-------|--------------------------|-------------------------|-------------------------|-----------------------|------------------------------|--------------------------|--------------------------|
|       |                          | <i>C<sub>11-d</sub></i> | <i>C<sub>11-h</sub></i> | <i>C<sub>22</sub></i> |                              |                          |                          |
| 1     | Au(0.1)/TiO <sub>2</sub> | 9.26                    | 4.40                    | 5.52                  | 19.2                         | 48.3                     | 67.8                     |
| 2     | Au(0.5)/TiO <sub>2</sub> | 15.7                    | 3.92                    | 8.96                  | 28.6                         | 54.9                     | 80.0                     |
| 3     | Au(1.0)/TiO <sub>2</sub> | 6.68                    | 3.08                    | 5.96                  | 15.7                         | 42.5                     | 68.5                     |

<sup>a</sup> Reaction condition: the amount of catalyst was 50 mg, lauric acid (40 mg, 50 μmol) was used in a solution consisting of D<sub>2</sub>O (3 mL), and acetonitrile (CH<sub>3</sub>CN, 2 mL); reaction time was 3 h; incident light wavelength > 360 nm; irradiated light intensity was 41 mW·cm<sup>-2</sup> when measured at 360±20 nm. See other caption in Table S1 and Table S3.

Table S5 Photocatalytic deuteration of lauric acid with different ratios of acetonitrile and D<sub>2</sub>O <sup>a</sup>

| Entry | D <sub>2</sub> O:CH <sub>3</sub> CN | Product yield (%)       |                         |                       | <i>Y<sub>total</sub></i> (%) | <i>S<sub>d</sub></i> (%) <sup>c</sup> | <i>R<sub>d</sub></i> (%) <sup>d</sup> |
|-------|-------------------------------------|-------------------------|-------------------------|-----------------------|------------------------------|---------------------------------------|---------------------------------------|
|       |                                     | <i>C<sub>11-d</sub></i> | <i>C<sub>11-h</sub></i> | <i>C<sub>22</sub></i> |                              |                                       |                                       |
| 1     | 2:3                                 | 4.09                    | 6.08                    | 1.89                  | 12.1                         | 33.9                                  | 40.2                                  |
| 2     | 1:1                                 | 8.92                    | 6.16                    | 3.50                  | 18.6                         | 48.0                                  | 59.2                                  |
| 3     | 3:2                                 | 16.4                    | 3.10                    | 3.41                  | 22.9                         | 71.6                                  | 84.1                                  |

<sup>a</sup> Reaction condition: the amount of catalyst was 50 mg, lauric acid (40 mg, 50 μmol) was used in a solution consisting of acetonitrile and D<sub>2</sub>O with various ratios; reaction time was 3 h; the incident light wavelength was longer than 360 nm; irradiated light intensity was 41 mW·cm<sup>-2</sup> when measured at 360±20 nm. Before the reaction, the catalysts were heated in an argon flow at 450 K for 0.5 h. Other reaction conditions are the same as mentioned in Table S4.

Table S6 Photocatalytic deuteration of lauric acid with various light irradiation intensities <sup>a</sup>

| Entry | Light intensity (mW cm <sup>-2</sup> ) | Product yield (%)       |                         |                       | <i>Y<sub>total</sub></i> (%) | <i>S<sub>d</sub></i> (%) | <i>R<sub>d</sub></i> (%) |
|-------|----------------------------------------|-------------------------|-------------------------|-----------------------|------------------------------|--------------------------|--------------------------|
|       |                                        | <i>C<sub>11-d</sub></i> | <i>C<sub>11-h</sub></i> | <i>C<sub>22</sub></i> |                              |                          |                          |
| a     | 4.9                                    | 4.16                    | 3.05                    | 2.13                  | 9.34                         | 44.5                     | 57.7                     |
| b     | 11.8                                   | 7.57                    | 4.38                    | 2.01                  | 14.0                         | 54.2                     | 63.4                     |
| c     | 20.5                                   | 11.2                    | 6.17                    | 2.47                  | 19.9                         | 56.5                     | 64.5                     |
| d     | 41.0                                   | 16.4                    | 3.10                    | 3.41                  | 22.9                         | 71.6                     | 84.1                     |

<sup>a</sup> Reaction conditions: the 50 mg of catalyst Au(0.5)/TiO<sub>2</sub> was used with different irradiation intensities from 4.9 mW·cm<sup>-2</sup> to 41 mW·cm<sup>-2</sup>. Before the reaction, the catalysts were heated in an argon flow at 450 K for 0.5 h. Other reaction conditions are the same as mentioned in Table S4.

Table S7 Photocatalytic deuteration of lauric acid over different pretreatment conditions <sup>a</sup>

| Entry | Pretreatment |                          | Product yield (%)       |                         |                       | <i>Y<sub>total</sub></i> (%) | <i>S<sub>d</sub></i> (%) | <i>R<sub>d</sub></i> (%) |
|-------|--------------|--------------------------|-------------------------|-------------------------|-----------------------|------------------------------|--------------------------|--------------------------|
|       | heating      | irradiation              | <i>C<sub>11-d</sub></i> | <i>C<sub>11-h</sub></i> | <i>C<sub>22</sub></i> |                              |                          |                          |
| a     | no           | no                       | 7.09                    | 4.13                    | 4.44                  | 15.7                         | 45.3                     | 63.2                     |
| b     | no           | with D <sub>2</sub> O    | 8.85                    | 5.25                    | 1.61                  | 15.7                         | 56.3                     | 62.8                     |
| c     | done         | with D <sub>2</sub> O    | 15.3                    | 2.68                    | 4.33                  | 22.3                         | 68.5                     | 85.1                     |
| d     | done         | without D <sub>2</sub> O | 16.4                    | 3.10                    | 3.41                  | 22.9                         | 71.6                     | 84.1                     |

<sup>a</sup> Reaction conditions: the 50 mg of catalyst Au(0.5)/TiO<sub>2</sub> was used with the following conditions: (a,b) without or (c,d) with preheating; pre-irradiation in the (c) presence or (d) absence of D<sub>2</sub>O. Other reaction conditions are the same as mentioned in Table S4.

Table S8 Photocatalytic deuteration of lauric acid over different solvents <sup>a</sup>

| Entry | Component                           | Product yield (%) |            |          | $Y_{total}(\%)$ | $S_d(\%)$ | $R_d(\%)$ |
|-------|-------------------------------------|-------------------|------------|----------|-----------------|-----------|-----------|
|       |                                     | $C_{11-d}$        | $C_{11-h}$ | $C_{22}$ |                 |           |           |
| a     | D <sub>2</sub> O/CH <sub>3</sub> CN | 16.4              | 3.10       | 3.41     | 22.9            | 71.6      | 84.1      |
| b     | D <sub>2</sub> O/CD <sub>3</sub> CN | 19.4              | 5.05       | 3.84     | 28.3            | 68.6      | 79.3      |
| c     | H <sub>2</sub> O/CD <sub>3</sub> CN | 0                 | 26.2       | 2.94     | 29.2            | 0         | 0         |
| d     | H <sub>2</sub> O/CH <sub>3</sub> CN | 0                 | 27.5       | 2.84     | 30.3            | 0         | 0         |

<sup>a</sup> The catalyst was 50 mg of Au(0.5)/TiO<sub>2</sub>, lauric acid (40 mg, 50  $\mu$ mol) was used in a solution consisting of CH<sub>3</sub>CN/CD<sub>3</sub>CN (2 mL) and H<sub>2</sub>O/D<sub>2</sub>O (3 mL). Other conditions are the same as in Table S7, entry d.

Table S9 Relative enthalpy <sup>a</sup> of undecyl radical ( $\dot{C}_{11}H_{23}$ ) having a radical center at the  $n$ -th carbon from the terminal one in linear undecyl radical, CH<sub>3</sub>(CH<sub>2</sub>) <sub>$x$</sub> CH(CH<sub>2</sub>)<sub>8- $x$</sub> CH<sub>3</sub> ( $x=0-3$ , corresponding to  $n=2-5$ ), calculated by Gaussian 16. <sup>S3</sup>

| $n$                                          | 1st | 2nd   | 3rd   | 4th   | 5th   |
|----------------------------------------------|-----|-------|-------|-------|-------|
| $\Delta H / \text{kJ} \cdot \text{mol}^{-1}$ | 0   | -6.95 | -5.40 | -5.24 | -5.08 |

<sup>a</sup> Optimized structure of corresponding linear undecyl radicals in water and their vibrational frequencies without negative ones were calculated by ump2(full)/aug-cc-pvdz method by Gaussian 16.<sup>S3</sup> All linear undecyl radicals are assumed to be in *trans* structures.

## References

- S1 A. A. Leushukou, A. V. Krech and A. L. Hurski, *Org. Lett.*, 2022, **24**, 6277–6281.  
 S2 Y. L. Sun, F. F. Tan, R. G. Hu, et al., *Chin. J. Chem.*, 2022, **40**, 1903–1908.  
 S3 M. J. Frisch, G. W. Trucks, H. B. Schlegel, G. E. Scuseria, M. A. Robb, J. R. Cheeseman, G. Scalmani, V. Barone, G. A. Petersson, H. Nakatsuji, et al. Gaussian 16, Revision C.02; Gaussian, Inc.: Wallingford CT, 2019.
